# Supplementary material
Source: ML conference proceedings conference paper supplement (https://openreview.net/forum?id=At9JmGF3xy)
Supplement: supplementary_material [file attachment]

# TOWARD GENERALIZING VISUAL BRAIN DECODING TO UNSEEN SUBJECTS – SUPPLEMENTARY FILE

**Anonymous authors**

Paper under double-blind review

In this supplementary file, we first provide the details of the networks used in the main paper. Second, we outline the details of the BiMixCo+SoftCLIP training strategy used in Sec.4.5 of the main paper. Lastly, we present the visualization of the image retrieval results.

## 1 THE DETAILS OF ARCHITECTURES

In the main paper, we validated the generalization capability of visual brain decoding models on unseen subjects across popular network architectures, including MLP, CNN and Transformer. We show the detailed network structures in this section. The input to the networks is fMRI voxels of size  $113 \times 136 \times 113$ .

Table 1: Detailed architecture of our MLP network.

| Layer Type        | Input Size                           | Output Size                        | Kernel/Linear Size    | Stride/Padding      |
|-------------------|--------------------------------------|------------------------------------|-----------------------|---------------------|
| Conv3D (conv1)    | $1 \times 113 \times 136 \times 113$ | $32 \times 38 \times 46 \times 38$ | $9 \times 9 \times 9$ | Stride 3, Padding 4 |
| BatchNorm3D (bn1) | $32 \times 38 \times 46 \times 38$   | $32 \times 38 \times 46 \times 38$ | -                     | -                   |
| Conv3D (conv2)    | $32 \times 38 \times 46 \times 38$   | $48 \times 19 \times 23 \times 19$ | $7 \times 7 \times 7$ | Stride 2, Padding 3 |
| BatchNorm3D (bn2) | $48 \times 19 \times 23 \times 19$   | $48 \times 19 \times 23 \times 19$ | -                     | -                   |
| Conv3D (conv3)    | $48 \times 19 \times 23 \times 19$   | $64 \times 10 \times 12 \times 10$ | $5 \times 5 \times 5$ | Stride 2, Padding 2 |
| BatchNorm3D (bn3) | $64 \times 10 \times 12 \times 10$   | $64 \times 10 \times 12 \times 10$ | -                     | -                   |
| ReLU (activation) | $64 \times 10 \times 12 \times 10$   | $64 \times 10 \times 12 \times 10$ | -                     | -                   |
| Flatten           | $64 \times 10 \times 12 \times 10$   | 76800                              | -                     | -                   |
| Linear (lin0)     | 76800                                | 4096                               | -                     | -                   |
| MLP (4 layers)    | 4096                                 | 4096                               | -                     | -                   |
| Linear (lin1)     | 4096                                 | $257 \times 1024$                  | -                     | -                   |

**MLP.** Tab. 1 presents the architecture of our MLP network. We first employ a 3-layer 3D CNN for feature extraction, followed by a fully connected layer to reduce the feature to a 1D vector of 4096 elements. Similar to MindEye1 (Scotti et al., 2024), we apply the MLP backbone in this feature space with the vector length of 4096. Finally, we utilize a fully connected layer to expand the feature from 4096 to  $257 \times 1024$ , which is used for loss calculation.

**1D CNN.** As shown in Tab. 2, similar to our MLP network, our 1D CNN network first reduces the feature to a vector of length 4096. Then we use several separate 1D CNN layers and eight 1D ResBlock layers for feature mapping, which constitute our 1D CNN backbone. Finally, a fully connected layer is used to produce the output with size of  $257 \times 1024$ .

**3D CNN.** Different from the above MLP and 1D CNN networks, as shown in Tab. 3, our 3D CNN network uses 3D CNN layers and 3D ResBlock layers to process the input. After the main processing, a fully connected layer is used to produce the final output with size of  $257 \times 1024$ .

**Transformer** The details of our Transformer network are shown in Tab. 4. Similar to our MLP and 1D CNN networks, our Transformer network first reduces the feature to a 4096 sized vector. Then we reshape the feature to  $16 \times 256$ , which is then sent to the Transformer backbone with 24 Transformer block layers. After that, we reshape the output of Transformer backbone back to 4096 and employ a fully connected layer to produce the final output with size of  $257 \times 1024$ .

Table 2: Detailed architecture of our 1D CNN network.

| Layer Type         | Input Size                           | Output Size                        | Kernel/Linear Size    | Stride/Padding      |
|--------------------|--------------------------------------|------------------------------------|-----------------------|---------------------|
| Conv3D (conv1)     | $1 \times 113 \times 136 \times 113$ | $32 \times 38 \times 46 \times 38$ | $9 \times 9 \times 9$ | Stride 3, Padding 4 |
| BatchNorm3D (bn1)  | $32 \times 38 \times 46 \times 38$   | $32 \times 38 \times 46 \times 38$ | -                     | -                   |
| Conv3D (conv2)     | $32 \times 38 \times 46 \times 38$   | $48 \times 19 \times 23 \times 19$ | $7 \times 7 \times 7$ | Stride 2, Padding 3 |
| BatchNorm3D (bn2)  | $48 \times 19 \times 23 \times 19$   | $48 \times 19 \times 23 \times 19$ | -                     | -                   |
| Conv3D (conv3)     | $48 \times 19 \times 23 \times 19$   | $64 \times 10 \times 12 \times 10$ | $5 \times 5 \times 5$ | Stride 2, Padding 2 |
| BatchNorm3D (bn3)  | $64 \times 10 \times 12 \times 10$   | $64 \times 10 \times 12 \times 10$ | -                     | -                   |
| ReLU (activation)  | $64 \times 10 \times 12 \times 10$   | $64 \times 10 \times 12 \times 10$ | -                     | -                   |
| Flatten            | $64 \times 10 \times 12 \times 10$   | 76800                              | -                     | -                   |
| Linear (lin0)      | 76800                                | 4096                               | -                     | -                   |
| Reshape            | 4096                                 | $1 \times 4096$                    | -                     | -                   |
| Conv1D (conv01)    | $1 \times 4096$                      | $64 \times 680$                    | Kernel 13             | Stride 6            |
| BatchNorm1D (bn01) | $64 \times 680$                      | $64 \times 680$                    | -                     | -                   |
| Conv1D (conv02)    | $64 \times 680$                      | $128 \times 134$                   | Kernel 11             | Stride 5            |
| BatchNorm1D (bn02) | $128 \times 134$                     | $128 \times 134$                   | -                     | -                   |
| Conv1D (conv03)    | $128 \times 134$                     | $256 \times 32$                    | Kernel 9              | Stride 4            |
| BatchNorm1D (bn03) | $256 \times 32$                      | $256 \times 32$                    | -                     | -                   |
| Conv1D (conv04)    | $256 \times 32$                      | $512 \times 9$                     | Kernel 7              | Stride 3            |
| BatchNorm1D (bn04) | $512 \times 9$                       | $512 \times 9$                     | -                     | -                   |
| ResBlock1D (x8)    | $512 \times 9$                       | $512 \times 9$                     | -                     | -                   |
| Flatten            | $512 \times 9$                       | 4608                               | -                     | -                   |
| Linear (lin1)      | 4608                                 | $257 \times 1024$                  | -                     | -                   |

Table 3: Detailed architecture of our 3D CNN network.

| Layer Type        | Input Size                           | Output Size                        | Kernel/Linear Size    | Stride/Padding      |
|-------------------|--------------------------------------|------------------------------------|-----------------------|---------------------|
| Conv3D (conv1)    | $1 \times 113 \times 136 \times 113$ | $32 \times 38 \times 46 \times 38$ | $9 \times 9 \times 9$ | Stride 3, Padding 4 |
| BatchNorm3D (bn1) | $32 \times 38 \times 46 \times 38$   | $32 \times 38 \times 46 \times 38$ | -                     | -                   |
| Conv3D (conv2)    | $32 \times 38 \times 46 \times 38$   | $48 \times 19 \times 23 \times 19$ | $7 \times 7 \times 7$ | Stride 2, Padding 3 |
| BatchNorm3D (bn2) | $48 \times 19 \times 23 \times 19$   | $48 \times 19 \times 23 \times 19$ | -                     | -                   |
| Conv3D (conv3)    | $48 \times 19 \times 23 \times 19$   | $64 \times 10 \times 12 \times 10$ | $5 \times 5 \times 5$ | Stride 2, Padding 2 |
| BatchNorm3D (bn3) | $64 \times 10 \times 12 \times 10$   | $64 \times 10 \times 12 \times 10$ | -                     | -                   |
| Conv3D (conv4)    | $64 \times 10 \times 12 \times 10$   | $90 \times 5 \times 6 \times 5$    | $5 \times 5 \times 5$ | Stride 2, Padding 2 |
| BatchNorm3D (bn4) | $90 \times 5 \times 6 \times 5$      | $90 \times 5 \times 6 \times 5$    | -                     | -                   |
| Conv3D (conv5)    | $90 \times 5 \times 6 \times 5$      | $150 \times 3 \times 3 \times 3$   | $5 \times 5 \times 5$ | Stride 2, Padding 2 |
| BatchNorm3D (bn5) | $150 \times 3 \times 3 \times 3$     | $150 \times 3 \times 3 \times 3$   | -                     | -                   |
| ReLU (activation) | $150 \times 3 \times 3 \times 3$     | $150 \times 3 \times 3 \times 3$   | -                     | -                   |
| ResBlock3D (x8)   | $150 \times 3 \times 3 \times 3$     | $150 \times 3 \times 3 \times 3$   | -                     | -                   |
| Flatten           | $150 \times 3 \times 3 \times 3$     | 4050                               | -                     | -                   |
| Linear (lin1)     | 4050                                 | $257 \times 1024$                  | -                     | -                   |

## 2 THE DETAILS OF TRAINING STRATEGY

In our main paper, we adopt the BiMixCo+SoftCLIP training strategy from MindEye1 (Scotti et al., 2024) to further enhance our visual brain decoding network. In this section, we provide the details of this strategy, which uses BiMixCo for one-third of the training and employs SoftCLIP for the rest of training.

**BiMixCo.** The BiMixCo combines MixCo (Kim et al., 2020) (an extension of mixup that uses the InfoNCE loss) and the bidirectional CLIP loss. To be specific, as described in MindEye1 (Scotti et al., 2024), voxels are mixed by a factor  $\lambda$  sampled from the Beta distribution with  $\alpha = \beta = 0.15$ :

$$x_{\text{mix}_{i,k_i}} = \lambda_i \cdot x_i + (1 - \lambda_i) \cdot x_{k_i}, \quad p_i^* = f(x_{\text{mix}_{i,k_i}}), \quad p_i = f(x_i), \quad t_i = \text{CLIP}_{\text{Image}}(y_i), \quad (1)$$

where  $x_i$  and  $y_i$  represent the  $i$ -th fMRI voxel and image, respectively.  $k_i \in [1, N]$  is an arbitrary mixing index for the  $i$ -th datapoint and  $f$  represents the decoding network.  $p^*$ ,  $p$  and  $t$  are  $L_2$ -

Table 4: Detailed architecture of our Transformer network.

| Layer Type                        | Input Size                           | Output Size                        | Kernel/Linear Size    | Stride/Padding         |
|-----------------------------------|--------------------------------------|------------------------------------|-----------------------|------------------------|
| Conv3D (conv1)                    | $1 \times 113 \times 136 \times 113$ | $32 \times 38 \times 46 \times 38$ | $9 \times 9 \times 9$ | Stride 3,<br>Padding 4 |
| BatchNorm3D (bn1)                 | $32 \times 38 \times 46 \times 38$   | $32 \times 38 \times 46 \times 38$ | -                     | -                      |
| Conv3D (conv2)                    | $32 \times 38 \times 46 \times 38$   | $48 \times 19 \times 23 \times 19$ | $7 \times 7 \times 7$ | Stride 2,<br>Padding 3 |
| BatchNorm3D (bn2)                 | $48 \times 19 \times 23 \times 19$   | $48 \times 19 \times 23 \times 19$ | -                     | -                      |
| Conv3D (conv3)                    | $48 \times 19 \times 23 \times 19$   | $64 \times 10 \times 12 \times 10$ | $5 \times 5 \times 5$ | Stride 2,<br>Padding 2 |
| BatchNorm3D (bn3)                 | $64 \times 10 \times 12 \times 10$   | $64 \times 10 \times 12 \times 10$ | -                     | -                      |
| ReLU (activation)                 | $64 \times 10 \times 12 \times 10$   | $64 \times 10 \times 12 \times 10$ | -                     | -                      |
| Flatten                           | $64 \times 10 \times 12 \times 10$   | 76800                              | -                     | -                      |
| Linear (lin0)                     | 76800                                | 4096                               | -                     | -                      |
| Reshape                           | 4096                                 | $16 \times 256$                    | -                     | -                      |
| Transformer (d=256, h=8)<br>(x24) | $16 \times 256$                      | $16 \times 256$                    | -                     | -                      |
| Reshape                           | $16 \times 256$                      | 4096                               | -                     | -                      |
| Linear (lin1)                     | 4096                                 | $257 \times 1024$                  | -                     | -                      |

normalized. The CLIP loss with MixCo is defined as:

$$\mathcal{L}_{\text{BiMixCo}} = - \sum_{i=1}^N \left[ \lambda_i \cdot \log \left( \frac{\exp \left( \frac{p_i^* \cdot t_i}{\tau} \right)}{\sum_{m=1}^N \exp \left( \frac{p_i^* \cdot t_m}{\tau} \right)} \right) + (1 - \lambda_i) \cdot \log \left( \frac{\exp \left( \frac{p_i^* \cdot t_{k_i}}{\tau} \right)}{\sum_{m=1}^N \exp \left( \frac{p_i^* \cdot t_m}{\tau} \right)} \right) \right] \\ - \sum_{j=1}^N \left[ \lambda_j \cdot \log \left( \frac{\exp \left( \frac{p_j^* \cdot t_j}{\tau} \right)}{\sum_{m=1}^N \exp \left( \frac{p_m^* \cdot t_j}{\tau} \right)} \right) + \sum_{\{l|k_l=j\}} (1 - \lambda_l) \cdot \log \left( \frac{\exp \left( \frac{p_l^* \cdot t_j}{\tau} \right)}{\sum_{m=1}^N \exp \left( \frac{p_m^* \cdot t_j}{\tau} \right)} \right) \right], \quad (2)$$

where  $\tau$  is a temperature hyperparameter, and  $N$  is the batch size.

**SoftCLIP.** The soft contrastive loss (Scotti et al., 2024) takes the dot product of CLIP image embeddings within a batch to generate the soft labels. The loss (we omit the bidirectional component for brevity) is calculated between CLIP-CLIP and Brain-CLIP matrices as:

$$\mathcal{L}_{\text{SoftCLIP}} = - \sum_{i=1}^N \sum_{j=1}^N \left[ \frac{\exp \left( \frac{t_i \cdot t_j}{\tau} \right)}{\sum_{m=1}^N \exp \left( \frac{t_i \cdot t_m}{\tau} \right)} \cdot \log \left( \frac{\exp \left( \frac{p_i \cdot t_j}{\tau} \right)}{\sum_{m=1}^N \exp \left( \frac{p_i \cdot t_m}{\tau} \right)} \right) \right]. \quad (3)$$

### 3 THE VISUALIZED IMAGE RETRIEVAL RESULTS

Fig. 1 depicts the image retrieval results of our visual brain decoding model, which is trained on 167 subjects from our consolidated HCP dataset. The results are extracted from the testing of Subject 1, which is an unseen subject to this model. We show the top three images that have the highest retrieval similarities to the target image seen by Subject 1. We can see from Fig. 1 that the retrieved images exhibit significant visual similarity to the target image. For example, in the first row, the target and retrieved images are all facial images, while the first retrieved image is exactly the target image. In the fourth row, all the retrieved images have two persons, as in the target image. In the last two rows, the retrieved images share similar colors and tones to the target images. Nonetheless, in some cases, such as the second retrieved image in the fifth row and the third retrieved image in the sixth row, the retrieval results are not satisfactory.

### REFERENCES

- Sungnyun Kim, Gihun Lee, Sangmin Bae, and Seyoung Yun. Mixco: Mix-up contrastive learning for visual representation. *ArXiv*, abs/2010.06300, 2020.
- Paul Scotti, Atmadeep Banerjee, Jimmie Goode, Stepan Shabalín, Alex Nguyen, Aidan Dempster, Nathalie Verlinde, Elad Yundler, David Weisberg, Kenneth Norman, et al. Reconstructing the

162  
163  
164  
165  
166  
167  
168  
169  
170  
171  
172  
173  
174  
175  
176  
177  
178  
179  
180  
181  
182  
183  
184  
185  
186  
187  
188  
189  
190  
191  
192  
193  
194  
195  
196  
197  
198  
199  
200  
201  
202  
203  
204  
205  
206  
207  
208  
209  
210  
211  
212  
213  
214  
215

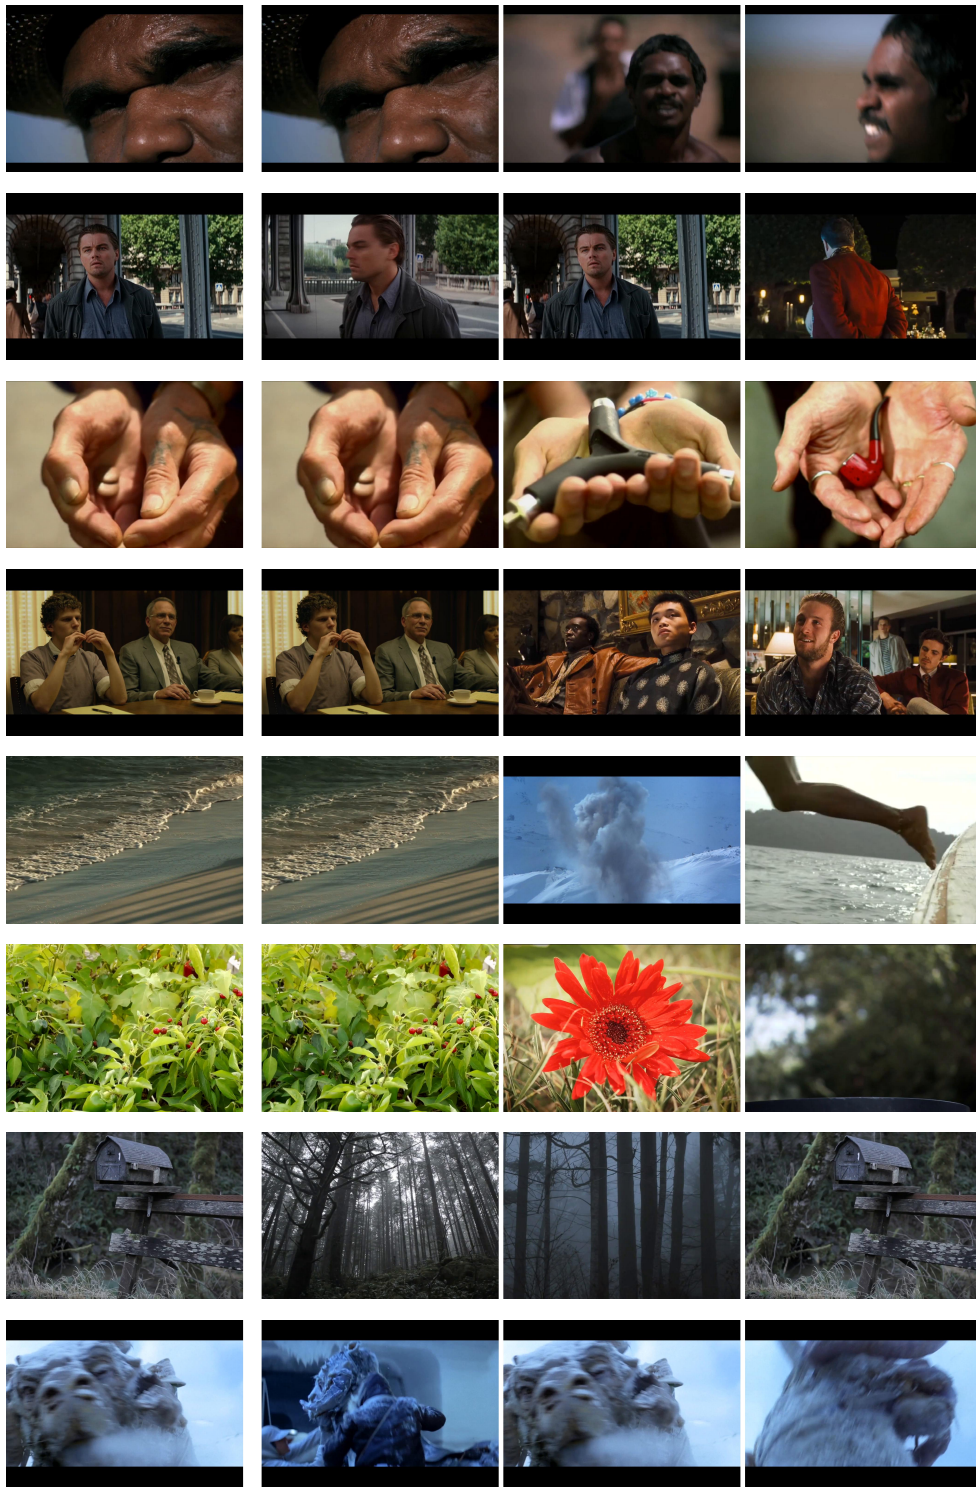

Target images      Retrieved images      Retrieved images      Retrieved images

Figure 1: The visualized image retrieval results. ‘Target images’ refer to those viewed by Subj 1 from the HCP dataset, while ‘Retrieved images’ represent the corresponding retrieval outputs from the visual brain decoding model trained on 167 subjects. The retrieved images are ranked from left to right based on retrieval similarity.

216 mind's eye: fmri-to-image with contrastive learning and diffusion priors. *Advances in Neural*  
217 *Information Processing Systems*, 36, 2024.  
218  
219  
220  
221  
222  
223  
224  
225  
226  
227  
228  
229  
230  
231  
232  
233  
234  
235  
236  
237  
238  
239  
240  
241  
242  
243  
244  
245  
246  
247  
248  
249  
250  
251  
252  
253  
254  
255  
256  
257  
258  
259  
260  
261  
262  
263  
264  
265  
266  
267  
268  
269
